# Supplementary material for: Bioconjugation Strategy for Ceramic Membranes Decorated with Candida Antarctica Lipase B—Impact of Immobilization Process on Material Features
Source: MDPI journal article supplement (doi:10.3390/ma15020671), 2022-01-17
Supplement: s1 [file s1]

## Supporting Information

### Bioconjugation Strategy for Ceramic Membranes Decorated with *Candida Antarctica* Lipase B—Impact of Immobilization Process on Material Features

Joanna Kujawa <sup>1</sup>, Marta Głodek <sup>1</sup>, Izabela Koter <sup>1</sup>, Guoqiang Li <sup>1</sup>, Katarzyna Knozowska <sup>1</sup>,  
Wojciech Kujawski <sup>1,\*</sup>

<sup>1</sup> Nicolaus Copernicus University in Toruń, Faculty of Chemistry, 7 Gagarina Street, 87-100 Toruń, Poland;

\* Correspondence: kujawski@chem.umk.pl; Tel.: +48-56-611-45-17 (W.K.)  
Received: date; Accepted: date; Published: date

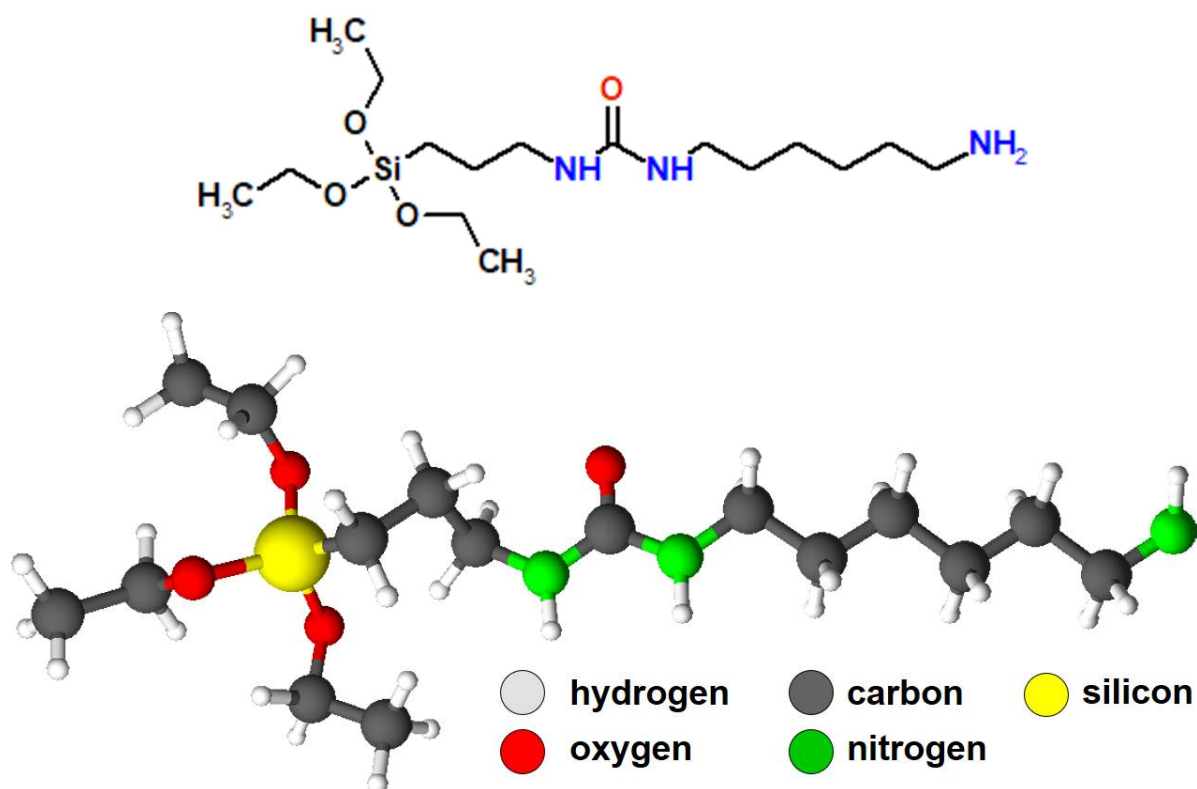

Figure S1. Synthesized modifier.

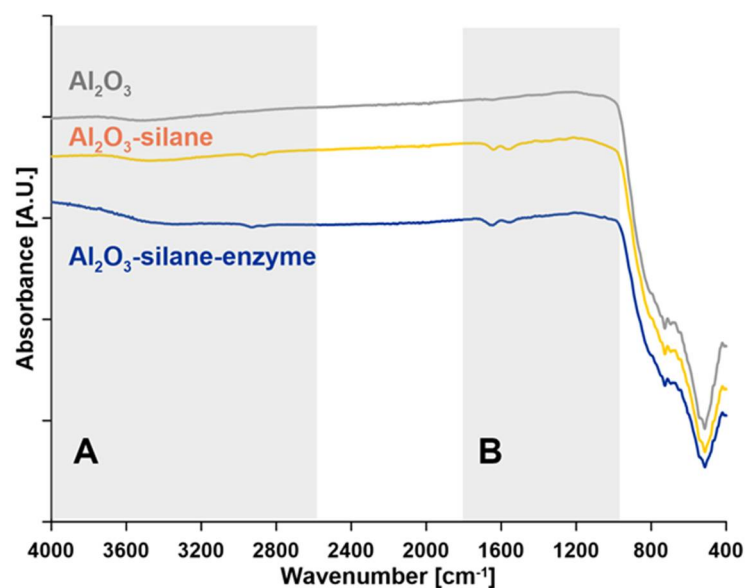

**Figure S2.** ATR-FTIR spectra of pristine  $\text{Al}_2\text{O}_3$  powder and  $\text{Al}_2\text{O}_3$  powder modified with silane. Sections A and B are presented in Figure 1 in detail.

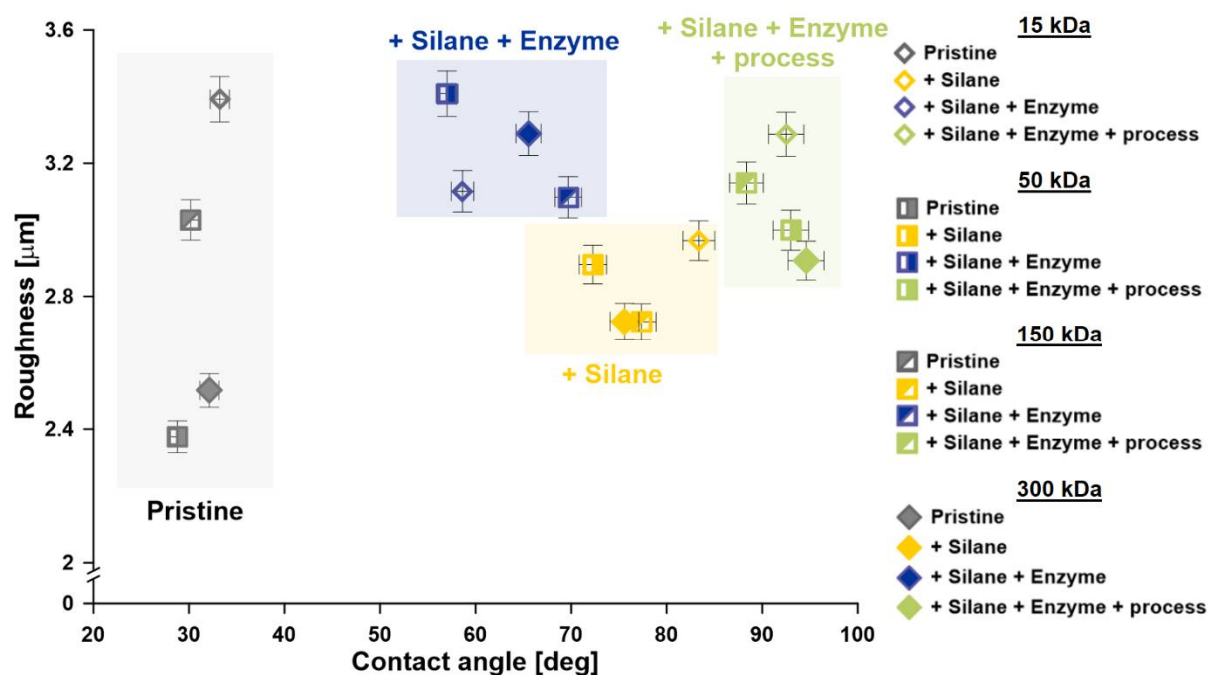

**Figure S3.** Relation between roughness and contact angle of the investigated membranes.
